# Supplementary material for: The use of mosquito nets in fisheries: A global perspective
Source: PubMed Central journal article supplement (PMC5791988; doi:10.1371/journal.pone.0191519), 2018-01-31
Supplement: pone.0191519.s002.pdf [file pone.0191519.s002.pdf]

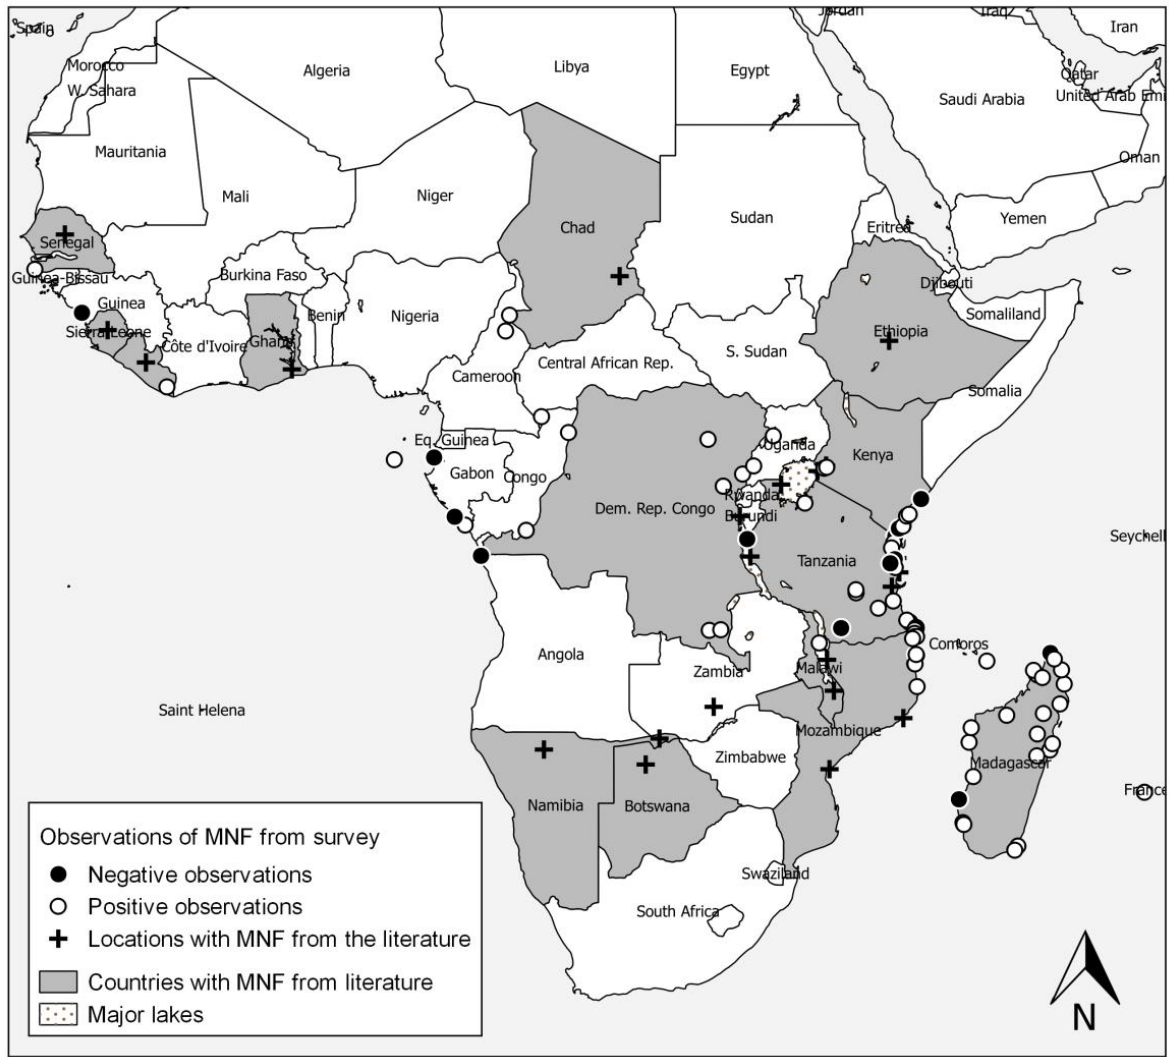

**S2 Fig. Map of survey responses in Africa showing positive and negative reports of MNF**
