# Supplementary material for: The use of mosquito nets in fisheries: A global perspective
Source: PubMed Central journal article supplement (PMC5791988; doi:10.1371/journal.pone.0191519), 2018-01-31
Supplement: pone.0191519.s003.pdf [file pone.0191519.s003.pdf]

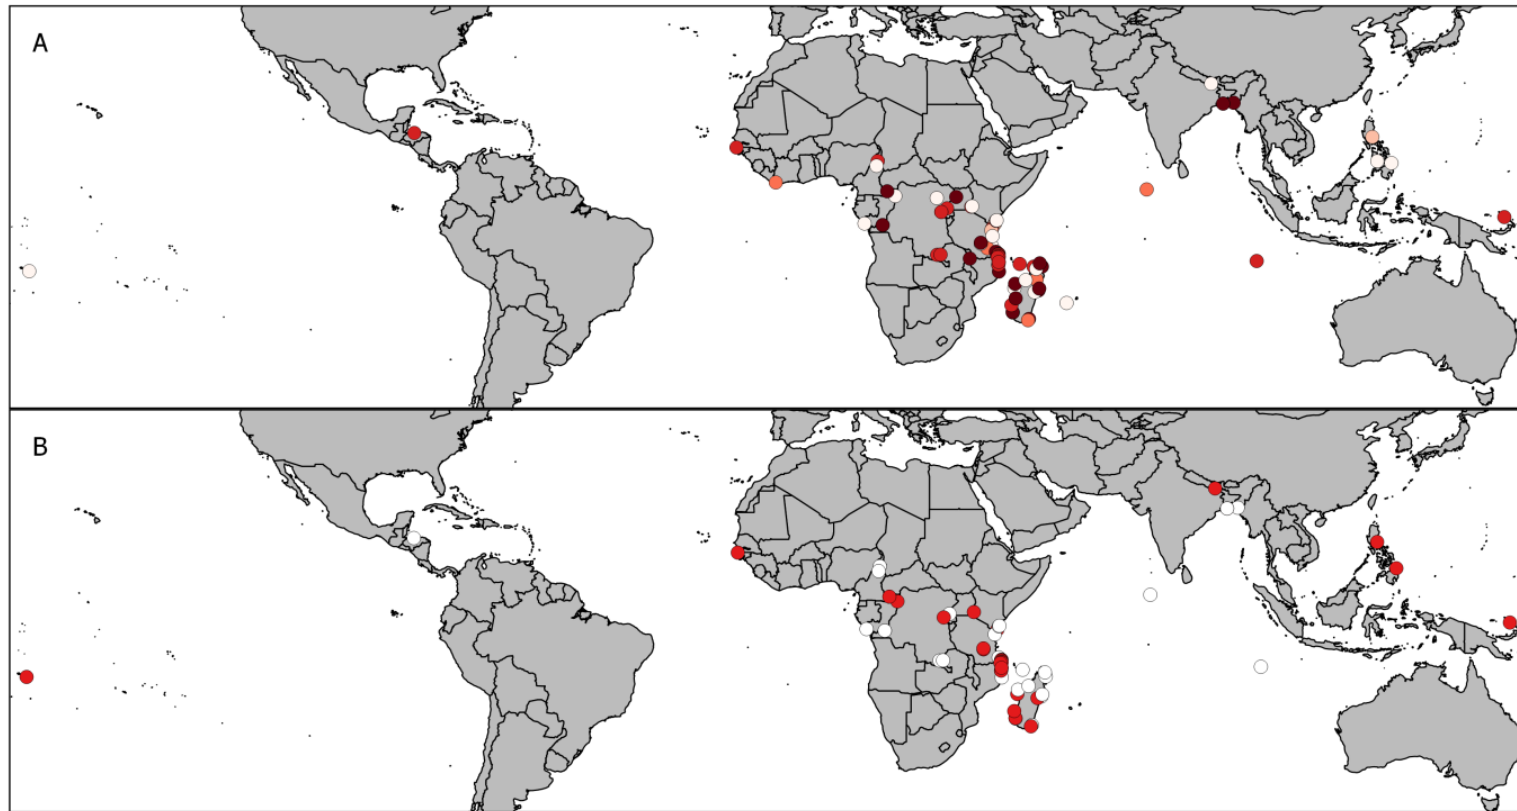

A. Observed MNF incidence

- everyday
- More than once week
- Once a week
- once a month
- occasional

B. Observed MNF seasonality

- seasonal
- year round

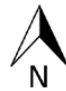

**S3 Fig. Observed global incidence frequency and seasonality of MNF from survey responses**
