# Supplementary material for: The use of mosquito nets in fisheries: A global perspective
Source: PubMed Central journal article supplement (PMC5791988; doi:10.1371/journal.pone.0191519), 2018-01-31
Supplement: pone.0191519.s005.pdf [file pone.0191519.s005.pdf]

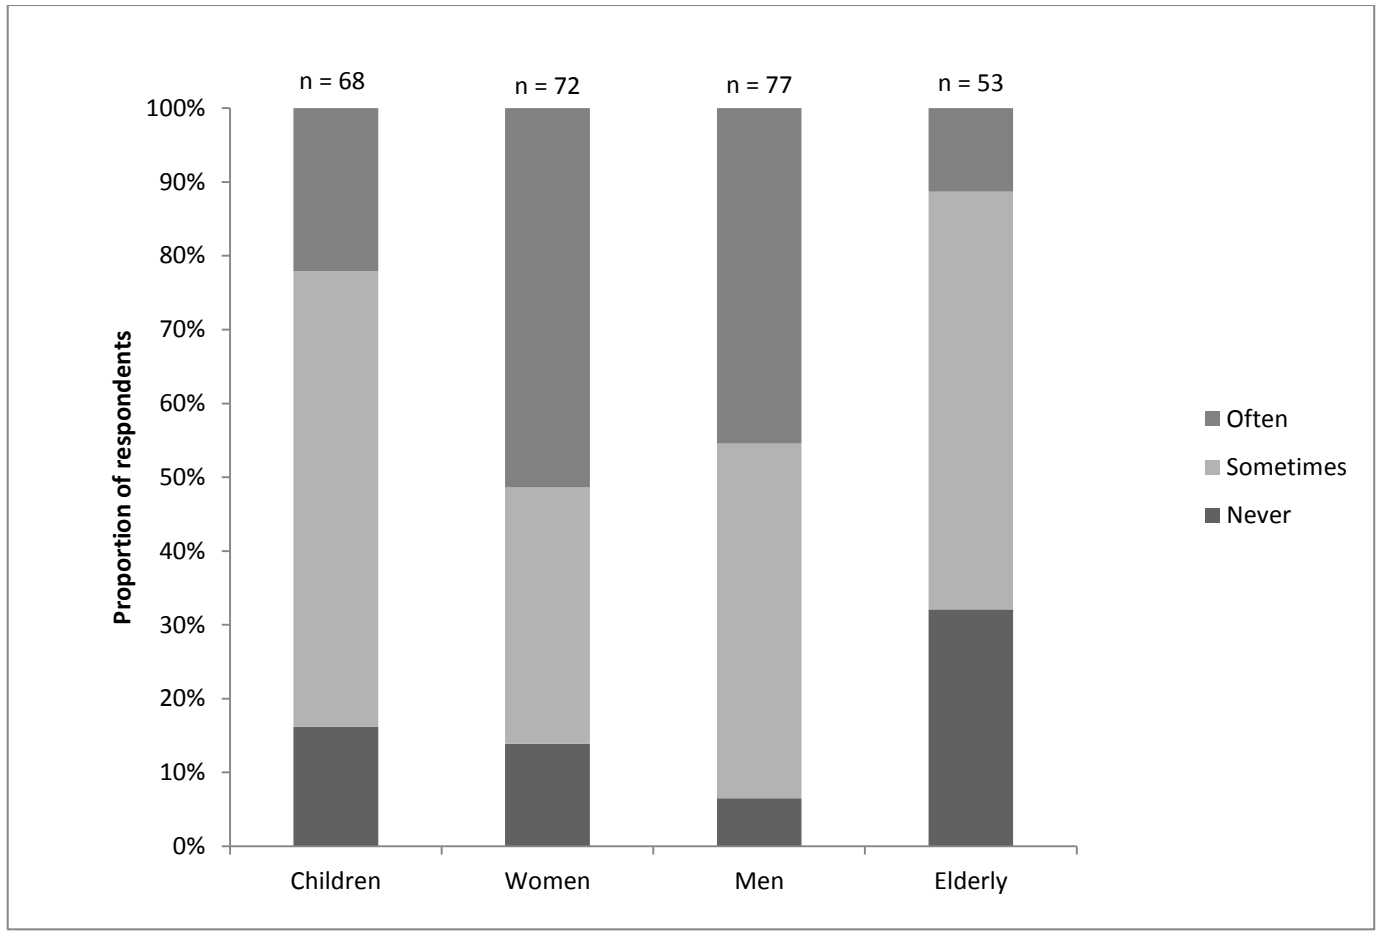

S5 Fig. Demographics of proportion of the observed population engaging in MNF either 'often', 'sometimes' or 'never'.
