# Supplementary material for: The use of mosquito nets in fisheries: A global perspective
Source: PubMed Central journal article supplement (PMC5791988; doi:10.1371/journal.pone.0191519), 2018-01-31
Supplement: pone.0191519.s006.pdf [file pone.0191519.s006.pdf]

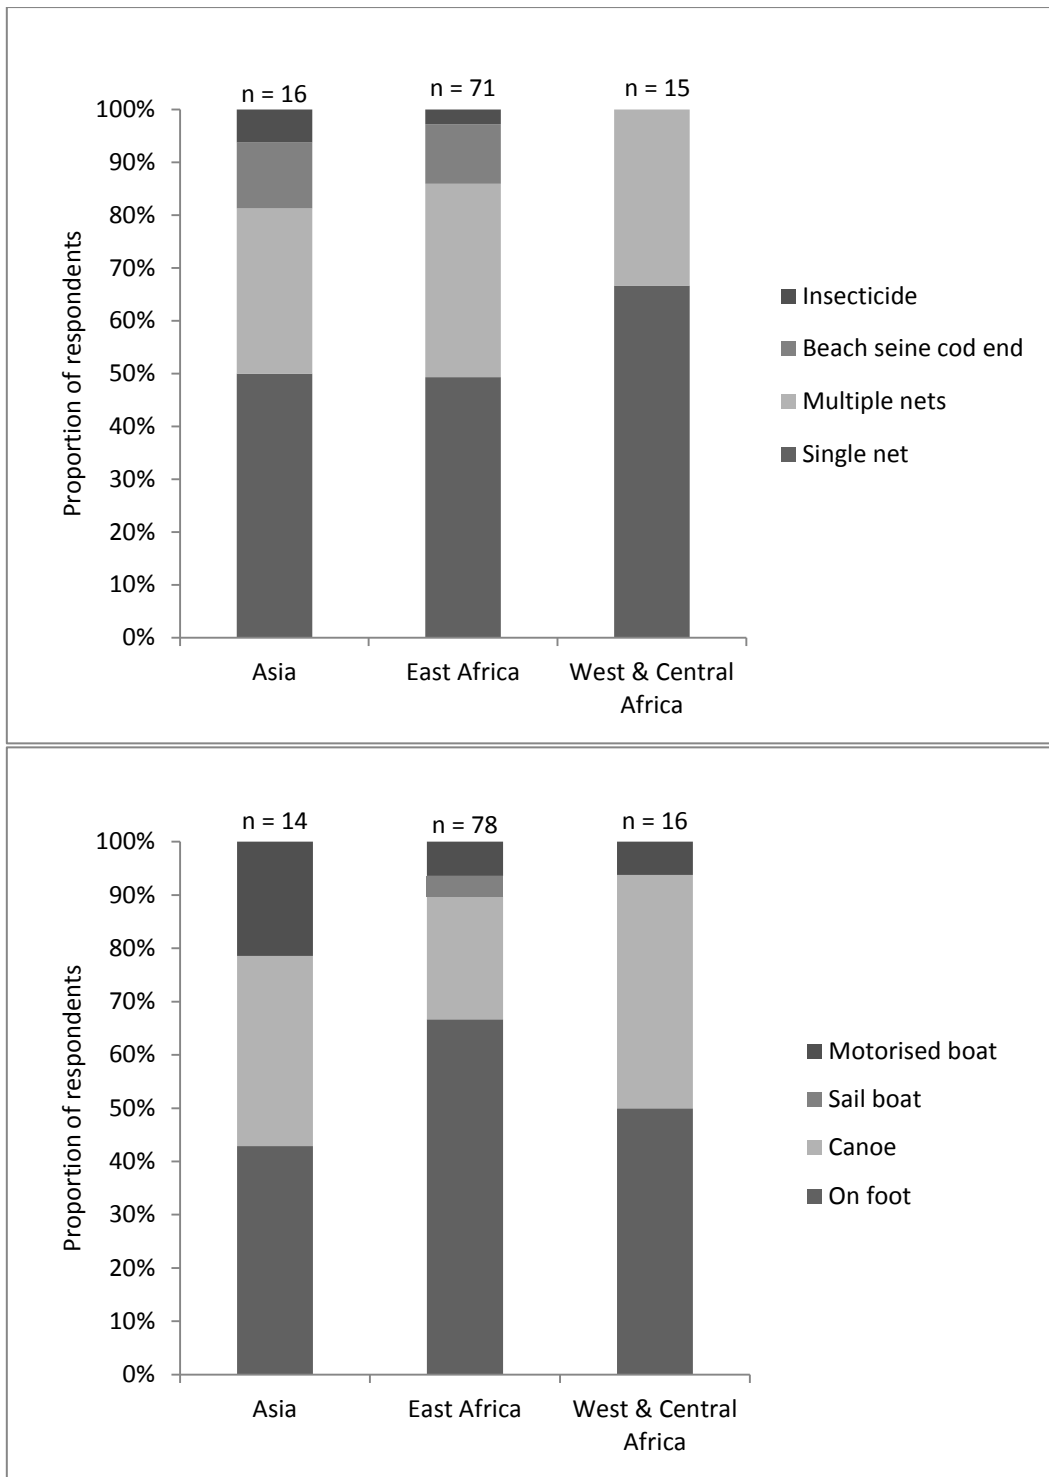

**S6 Fig. Proportion of respondents reporting various modes of deployment for MN fishing.**
