# Supplementary material for: The use of mosquito nets in fisheries: A global perspective
Source: PubMed Central journal article supplement (PMC5791988; doi:10.1371/journal.pone.0191519), 2018-01-31
Supplement: pone.0191519.s007.pdf [file pone.0191519.s007.pdf]

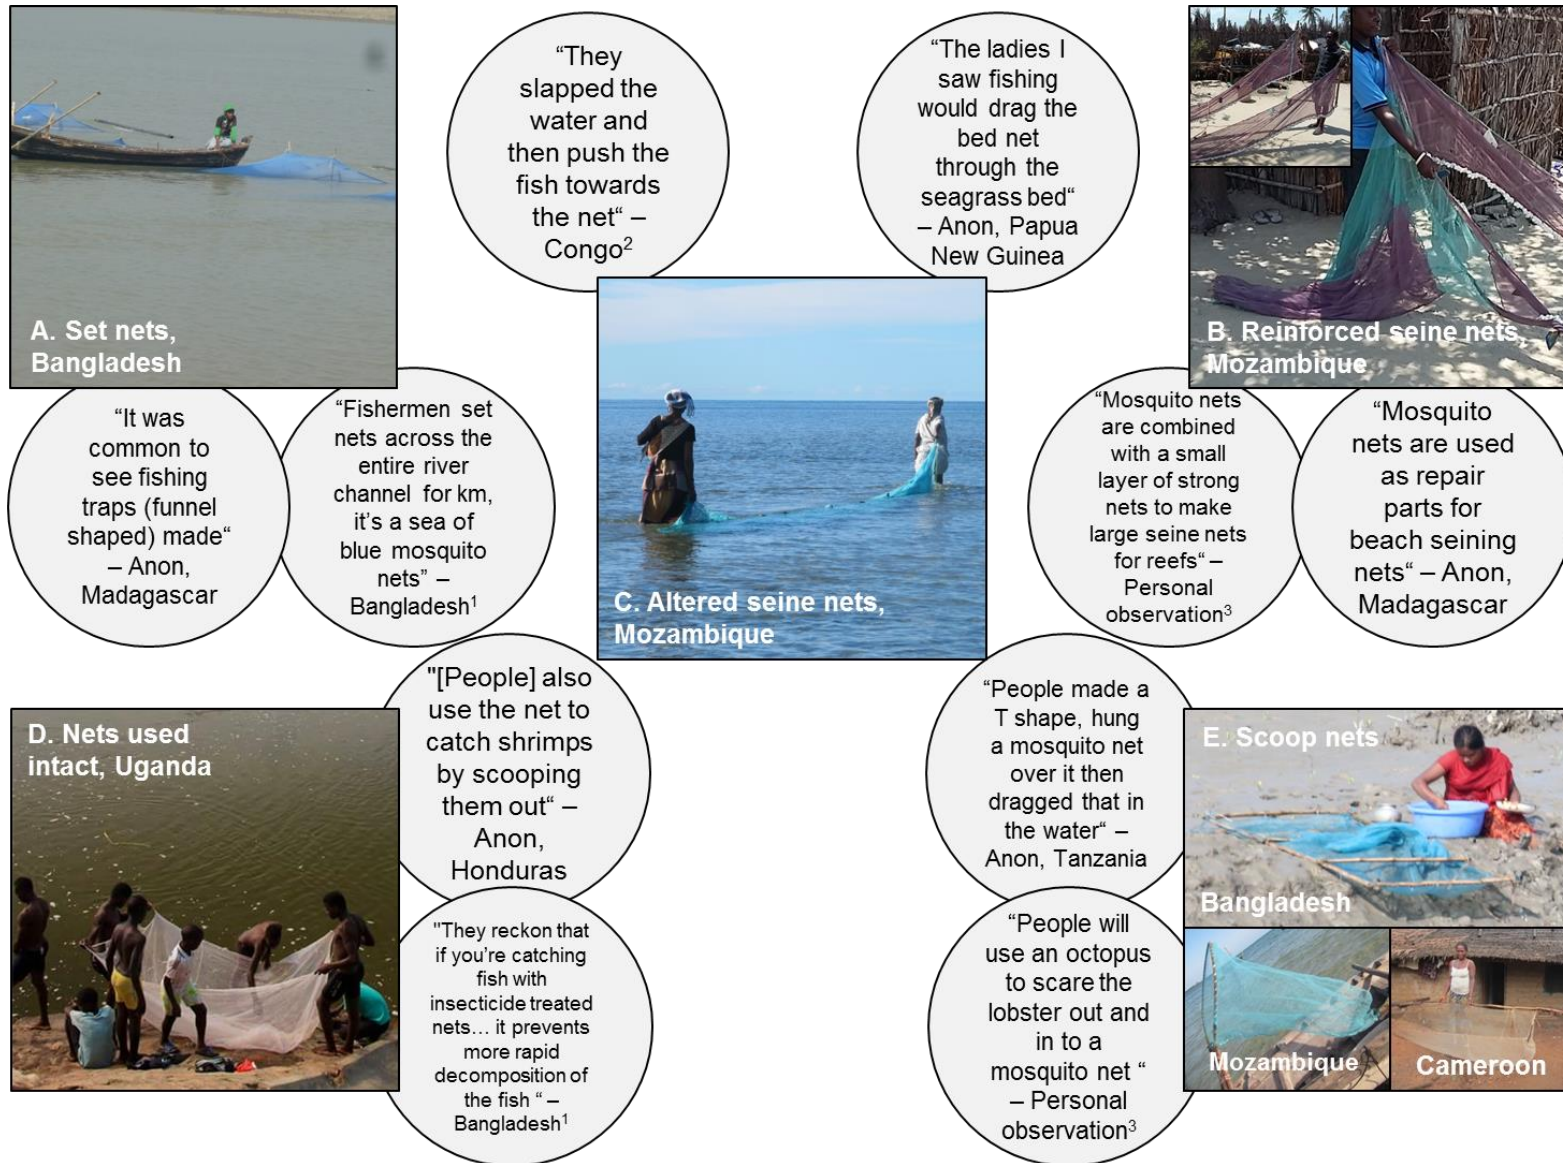

**S7 Fig. Summary of additional information provided by respondents.**

Photo credits: A) R. C. Browmick, B+C) R. Short, D) C. Hopkins, E) Bangladesh - N. Dewhurst-Richman, Mozambique – R. Short, Cameroon – J. Wright

<sup>1</sup>Nadia Dewhurst-Richman, Zoological Society of London; <sup>2</sup>Petra Lahann, German Development Corporation; <sup>3</sup>Rebecca Short, Imperial College London.
