# Supplementary material for: The use of mosquito nets in fisheries: A global perspective
Source: PubMed Central journal article supplement (PMC5791988; doi:10.1371/journal.pone.0191519), 2018-01-31
Supplement: pone.0191519.s008.pdf [file pone.0191519.s008.pdf]

**S1 Table: Predominant peer reviewed literature with direct reference to use of MNs for fishing at specific locations at time of questionnaire**

| Reference                     | Juvenile catch inferred | User group/s noted   | Location                            | Marine/freshwater | Potential impacts                                            | Potentially detracting from bed coverage? |
|-------------------------------|-------------------------|----------------------|-------------------------------------|-------------------|--------------------------------------------------------------|-------------------------------------------|
| (Abbott and Campbell, 2009)   | Yes                     | Women and children   | Namibia (upper Zambezi floodplains) | Freshwater        | Insecticide pollution                                        | -                                         |
| (Allan et al., 2012)          | -                       | -                    | Chad                                | Freshwater        | -                                                            | -                                         |
| (Atkinson et al., 2009)       | -                       | -                    | Solomon Islands                     | -                 | -                                                            | -                                         |
| (Banek et al., 2010)          | -                       | -                    | Liberia                             | -                 | -                                                            | Yes                                       |
| (Bennett et al., 2012)        | -                       | -                    | Sierra Leone                        | -                 | -                                                            | -                                         |
| (Darkey and Turatsinze, 2014) | Yes                     | Artisanal fishermen  | Mozambique, Beira                   | Marine            | Declining catch; Damage to benthos                           | -                                         |
| (Devi et al., 2013)           | -                       | Men, women, children | India                               | Freshwater        | -                                                            | -                                         |
| (Endebu et al., 2015)         | -                       | -                    | Ethiopia, Lake Zeway                | Freshwater        | -                                                            | -                                         |
| (Halafo et al., 2004)         | Yes                     | -                    | Mozambique, lake Niassa             | Freshwater        | Stock depletion                                              | -                                         |
| (Hamerlynck et al., 2011)     | Yes                     | Women and children   | Tanzania                            | Freshwater        | -                                                            | -                                         |
| (Jiddawi and Öhman, 2002)     | Yes                     | Women                | Tanzania                            | Marine            | -                                                            | -                                         |
| (Kimirei et al., 2008)        | Yes                     | -                    | Tanzania, Lake Tanganyika           | Freshwater        | Fishery collapse                                             | -                                         |
| (Koenker et al., 2013)        | -                       | -                    | Tanzania, Zanzibar                  | Marine            | -                                                            | -                                         |
| (Larson et al., 2014)         | -                       | -                    | Kenya, Lake Victoria                | Freshwater        | -                                                            | Yes                                       |
| (Loll et al., 2013)           | -                       | -                    | Senegal                             | -                 | -                                                            | -                                         |
| (Lover et al., 2011)          | -                       | -                    | Timor-Leste                         | -                 | -                                                            | Yes                                       |
| (McLean et al., 2014)         | Yes                     | -                    | Tanzania, Lake Tanganyika, DRC      | Freshwater        | Declining catch; Insecticide pollution; carcinogenic effects | Possibly - malaria rates unaffected       |
| (Minakawa et al., 2008)       | Not explicitly          | -                    | Kenya, Lake Victoria                | Freshwater        | -                                                            | Yes                                       |
| (Mosepele et al., 2009)       | -                       | -                    | Botswana, Okavango delta            | Freshwater        | -                                                            | -                                         |
| (Mushagalusa et al., 2014)    | -                       | -                    | DRC, Lake Tanganyika                | Freshwater        | -                                                            | -                                         |
| (Mutuku et al., 2013)         | -                       | -                    | Kenya                               | Marine            | -                                                            | Yes                                       |
| (Okeyo et al., 2004)          | -                       | Men and women        | Namibia                             | Freshwater        | -                                                            | -                                         |
| (Quarcoopome et al., 2011)    | Yes                     | -                    | Ghana                               | Freshwater        | Stock depletion                                              | -                                         |
| (Siddique et al., 2013)       | -                       | -                    | Bangladesh                          | Marine            | -                                                            | -                                         |
| (Sinha and Sinha, 2013)       | -                       | -                    | India                               | Freshwater        | Stock depletion                                              | -                                         |
| (Srivastava et al., 2002)     | -                       | -                    | India                               | Freshwater        | -                                                            | -                                         |
| (Tynsong and Tiwari, 2008)    | -                       | -                    | India                               | Freshwater        | -                                                            | -                                         |
| (van der Elst, 2003)          | Yes                     | Women                | Mozambique                          | Marine            | Conflicts with commercial trawler fishery                    | -                                         |
| (Tweddle et al., 2015)        | -                       | -                    | Zambia, Malawi                      | Freshwater        | -                                                            | -                                         |

- Abbott, J.G., Campbell, L.M., 2009. Environmental histories and emerging fisheries management of the Upper Zambezi river floodplains. *Conserv. Soc.* 7, 83–99.
- Allan, R., O'Reilly, L., Gilbos, V., Kilian, A., 2012. An Observational Study of Material Durability of Three World Health Organization–Recommended Long-Lasting Insecticidal Nets in Eastern Chad. *Am. J. Trop. Med. Hyg.* 87, 407–411. doi:10.4269/ajtmh.2012.11-0331
- Atkinson, J.-A., Bobogare, A., Fitzgerald, L., Boaz, L., Appleyard, B., Toaliu, H., Vallely, A., 2009. A qualitative study on the acceptability and preference of three types of long-lasting insecticide-treated bed nets in Solomon Islands: implications for malaria elimination. *Malar. J.* 8, 119. doi:10.1186/1475-2875-8-119
- Banek, K., Kilian, A., Allan, R., 2010. Evaluation of Interceptor long-lasting insecticidal nets in eight communities in Liberia. *Malar J* 9, 84.
- Bennett, A., Smith, S.J., Yambasu, S., Jambai, A., Alemu, W., Kabano, A., Eisele, T.P., 2012. Household Possession and Use of Insecticide-Treated Mosquito Nets in Sierra Leone 6 Months after a National Mass-Distribution Campaign. *PLoS ONE* 7, e37927. doi:10.1371/journal.pone.0037927
- Darkey, D., Turatsinze, R., 2014. Artisanal Fishing in Beira, Central Mozambique. *J Hum Ecol* 47, 317–328.
- Devi, B.N., Mishra, S.K., Das, L., Pawar, N.A., Chanu, T.I., 2013. Traditional fishing methods in Central valley region of Manipur, India. *Indian J. Tradit. Knowl.* 12, 137–143.
- Endebu, M., Lema, A., Genet, T., Mitike, A., 2015. Fisheries Baseline Survey Describing Status of Fisheries in Lake Zeway, Ethiopia. *J. Fish. Livest. Prod.* 03. doi:10.4172/2332-2608.1000129
- Halafo, J.S., Hecky, R.E., Taylor, W.D., 2004. The artisanal fishery of Metangula, Lake Malawi/Niassa, East Africa. *Afr. J. Aquat. Sci.* 29, 83–90. doi:10.2989/16085910409503795
- Hamerlynck, O., Duvail, S., Vandepitte, L., Kindinda, K., Nyingi, D.W., Paul, J.-L., Yanda, P.Z., Mwakalinga, A.B., Mgaya, Y.D., Snoeks, J., 2011. To connect or not to connect? Floods, fisheries and livelihoods in the Lower Rufiji floodplain lakes, Tanzania. *Hydrol. Sci. J.* 56, 1436–1451. doi:10.1080/02626667.2011.630002
- Jiddawi, N.S., Öhman, M.C., 2002. Marine Fisheries in Tanzania. *AMBIO J. Hum. Environ.* 31, 518. doi:10.1639/0044-7447(2002)031[0518:MFIT]2.0.CO;2
- Kimirei, I.A., Mgaya, Y.D., Chande, A.I., 2008. Changes in species composition and abundance of commercially important pelagic fish species in Kigoma area, Lake Tanganyika, Tanzania. *Aquat. Ecosyst. Health Manag.* 11, 29–35. doi:10.1080/14634980701881490
- Koenker, H.M., Loll, D., Rweyemamu, D., Ali, A.S., 2013. A good night's sleep and the habit of net use: perceptions of risk and reasons for bed net use in Bukoba and Zanzibar. *Malar J* 12, 10–1186.
- Larson, P.S., Minakawa, N., Dida, G.O., Njenga, S.M., Ionides, E.L., Wilson, M.L., 2014. Insecticide-treated net use before and after mass distribution in a fishing community along Lake Victoria, Kenya: successes and unavoidable pitfalls. *Malar J* 13, 466.
- Loll, D.K., Berthe, S., Faye, S.L., Wone, I., Koenker, H., Arnold, B., Weber, R., 2013. User-determined end of net life in Senegal: a qualitative assessment of decision-making related to the retirement of expired nets. *Malar J* 12, 10–1186.
- Lover, A.A., Sutton, B.A., Asy, A.J., Wilder-Smith, A., 2011. An exploratory study of treated-bed nets in Timor-Leste: patterns of intended and alternative usage. *Malar. J.* 10, 199.
- McLean, K.A., Byanaku, A., Kubikonse, A., Tshowe, V., Katensi, S., Lehman, A.G., 2014. Fishing with bed nets on Lake Tanganyika: a randomized survey. *Malar J* 13, 10–1186.
- Minakawa, N., Dida, G.O., Sonye, G.O., Futami, K., Kaneko, S., 2008. Unforeseen misuses of bed nets in fishing villages along Lake Victoria. *Malar. J.* 7, 165. doi:10.1186/1475-2875-7-165
- Mosepele, K., Moyle, P.B., Merron, G.S., Purkey, D.R., Mosepele, B., 2009. Fish, Floods, and Ecosystem Engineers: Aquatic Conservation in the Okavango Delta, Botswana. *BioScience* 59, 53–64. doi:10.1525/bio.2009.59.1.9
- Mushagalusa, C.D., Nshombo, M., Lushombo, M., 2014. Littoral fisheries on Cichlidae (Pisces) from the northwestern part of Lake Tanganyika, East Africa. *Aquat. Ecosyst. Health Manag.* 17, 41–51.
- Mutuku, F.M., Khambira, M., Bisanzio, D., Mungai, P., Mwanzo, I., Muchiri, E.M., King, C.H., Kitron, U., 2013. Physical condition and maintenance of mosquito bed nets in Kwale County, coastal Kenya. *Malar. J.* 12, 46. doi:10.1186/1475-2875-12-46
- Okeyo, D.O., Mubita, G., Harris, T.K., Sahombu, D.E., Namundjanga, J., Mulonga, S., Kapirika, S., 2004. Indigenous names of fish and fishing gear in the Cuvelai, Kavango and Caprivi regions of Namibia. *Afr. J. Aquat. Sci.* 29, 249–258. doi:10.2989/16085910409503817

- Quarcoopome, T., Amevenku, F., Ofori-Danson, P., 2011. Changes in the fish community of the Kpong Headpond, lower Volta River, Ghana after 25 years of impoundment. *Rev. Biol. Trop.* 59, 1685–1696.
- Siddique, A.B., Saha, D., Rahman, M., Hossain, M.B., 2013. Fishing gears of the Meghna river estuary of Chandpur region, Bangladesh.
- Sinha, Rajesh K., Sinha, R. K., 2013. Diversity of selective and non-selective fishing gears and their impact on Ganga fishery in Bihar. *Int. J. Bioassays* 2, 739–750.
- Srivastava, S.K., Sarkar, U.K., Patiyal, R.S., 2002. Fishing methods in streams of the Kumaon Himalayan region of India. *Asian Fish. Sci.* 15, 347–356.
- Tweddle, D., Cowx, I.G., Peel, R.A., Weyl, O.L.F., 2015. Challenges in fisheries management in the Zambezi, one of the great rivers of Africa. *Fish. Manag. Ecol.* 22, 99–111. doi:10.1111/fme.12107
- Tynsong, H., Tiwari, B.K., 2008. Traditional knowledge associated with fish harvesting practices of War Khasi of Meghalaya. *Indian J. Tradit. Knowl.* 7, 618–623.
- van der Elst, 2003. Local solutions to challenges of West Indian Ocean fisheries development. *NAGA WorldFish Cent. Q.* 26, 14–17.
