# Supplementary material for: The use of mosquito nets in fisheries: A global perspective
Source: PubMed Central journal article supplement (PMC5791988; doi:10.1371/journal.pone.0191519), 2018-01-31
Supplement: pone.0191519.s009.pdf [file pone.0191519.s009.pdf]

**S2 Table. Families identified by observations in MNF catch. NB – maturity status was not individually obtained for families so groupings are based on general associations at adult life stages.**

| <b>Reef/seagrass associated</b> | <b>Pelagic/neritic associated</b> | <b>Freshwater</b> |
|---------------------------------|-----------------------------------|-------------------|
| Acanthuridae                    | Ariidae                           | Alestidae         |
| Balistidae                      | Atherinidae                       | Aplocheilidae     |
| Caesonidae                      | Carangidae                        | Characidae        |
| Chaetodonidae                   | Chanidae                          | Cichlidae         |
| Epinephelinae                   | Clupidae                          | Clupidae          |
| Gobiidae                        | Drepaneidae                       | Cyprinidae        |
| Haemulidae                      | Elopidae                          | Gobiidae          |
| Holocentridae                   | Engraulidae                       |                   |
| Labridae                        | Gerridae                          |                   |
| Lethrinidae                     | Leiognathidae                     |                   |
| Lutjanidae                      | Mugilidae                         |                   |
| Mullidae                        | Scombridae                        |                   |
| Platycephalidae                 | Sparidae                          |                   |
| Pomacentridae                   |                                   |                   |
| Scaridae                        |                                   |                   |
| Sciaenidae                      |                                   |                   |
| Serranidae                      |                                   |                   |
| Siganidae                       |                                   |                   |
| Syngnathidae                    |                                   |                   |
| Tetradaontidae                  |                                   |                   |
